# Supplementary material for: HtrA2 suppresses autoimmune arthritis and regulates activation of STAT3
Source: PubMed Central journal article supplement (PMC5180098; doi:10.1038/srep39393), 2016-12-23
Supplement: srep39393-s2.pdf [file srep39393-s2.pdf]

## HtrA2 suppresses autoimmune arthritis and regulates activation of STAT3

### Running title: HtrA2 inhibits STAT3 activation in CIA

Seung Hoon Lee<sup>1\*</sup>, Young-Mee Moon<sup>1,2\*</sup>, Hyeon-Beom Seo<sup>1\*</sup>, Se-Young Kim<sup>1</sup>, Eun-Kyung Kim<sup>1</sup>, Junyeong Yi<sup>3,4</sup>, Min-Kyung Nam<sup>3,4</sup>, Jun-Ki Min<sup>1</sup>, Sung-Hwan Park<sup>1</sup>, Hyangshuk Rhim<sup>3,4</sup> and Mi-La Cho<sup>1,2</sup>

<sup>1</sup>The Rheumatism Research Center, Catholic Research Institute of Medical Science, The Catholic University of Korea, Seoul, South Korea

<sup>2</sup>Laboratory of Immune Network, Conversant Research Consortium in Immunologic disease, College of Medicine, The Catholic University of Korea

<sup>3</sup>Department of Biomedicine and Health Sciences, College of Medicine, The Catholic University of Korea, Seoul 137-701, Republic of Korea

<sup>4</sup>Department of Medical Life Sciences, College of Medicine, The Catholic University of Korea, Seoul 137-701, Republic of Korea

| Gene           | Sense primer (5'-->3')          | Antisense primer (3'-->5')      |
|----------------|---------------------------------|---------------------------------|
| PTEN           | AAT TCC CAG TCA GAG GCG CTA TGT | GAT TGC AAG TTC CGC CAC TGA ACA |
| IL-17A         | CCT CAA AGC TCA GCG TGT CC      | GAG CTC ACT TTT GCG CCA AG      |
| CCL20          | CAG CTG TTG CCT CTC GTA CA      | CAC CCA GTT CTG CTT TGG AT      |
| ROR $\gamma$ t | TGT CCT GGG CTA CCC TAC TG      | GTC CAG GAG TAG GCC ACA TT      |
| BATF           | GAC AAG AAG GGC GAT GCT AC      | GGC CTT AAG TCC CTC TGA CC      |
| RUNX1          | TAC CTG GGA TCC ATC ACC TC      | GAC GGC AGA GTA GGG AAC TG      |
| Foxp3          | GGC CCT TCT CCA GGA CAG A       | GCT GAT CAT GGC TGG GTT GT      |
| SOCS3          | CCT TTG ACA AGC GGA CTC TC      | GCC AGC ATA AAA ACC CTT CA      |
| Bcl2           | GCATCCCAGCCTCCGTTAT             | TGAGTACCTGAACCGGCATCT           |
| $\beta$ -actin | GAA ATC GTG CGT GAC ATC AAA G   | TGT AGT TTC ATG GAT GCC ACA G   |

Supplementary table 1. PCR primer sequence used in this study.
